# Supplementary material for: Thermally assisted layer–layer crosslinking towards programmable evolution of pore structures for tunable electromagnetic response capability
Source: Royal Society of Chemistry journal article supplement (doi:10.1039/d3nr06457c), 2024-01-01
Supplement: d3nr06457c1.pdf [file d3nr06457c1.pdf]

## Supporting Information

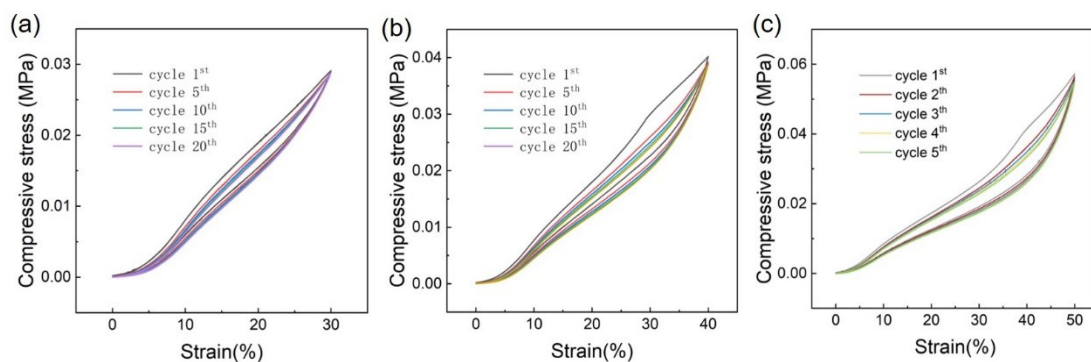

**Fig. S1.** Stress-strain curves of CR-3 aerogel under different degree (30%, 40%, 50%) of compress.

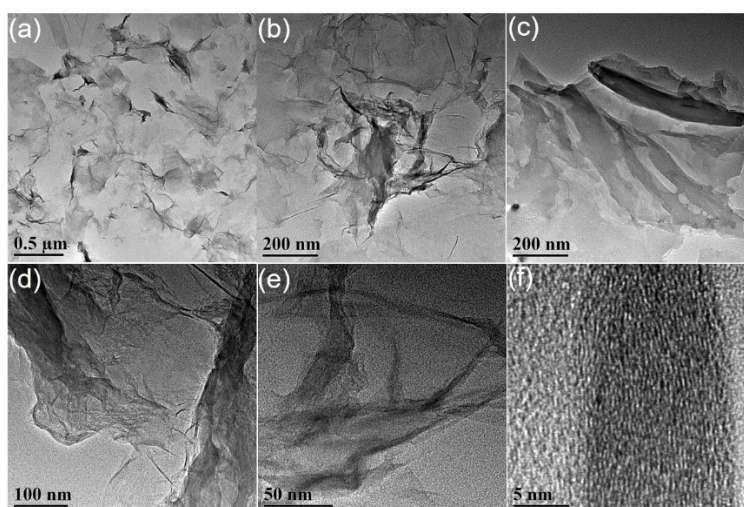

**Fig. S2.** TEM images of CR aerogel at different magnifications.

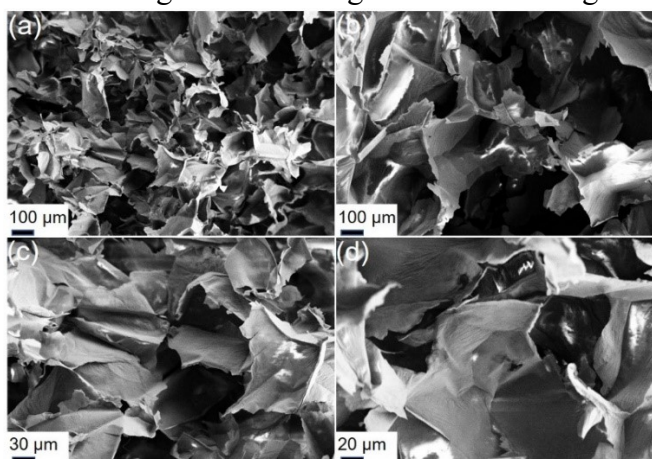

**Figure S3.** SEM images of PCR aerogels at different magnifications.

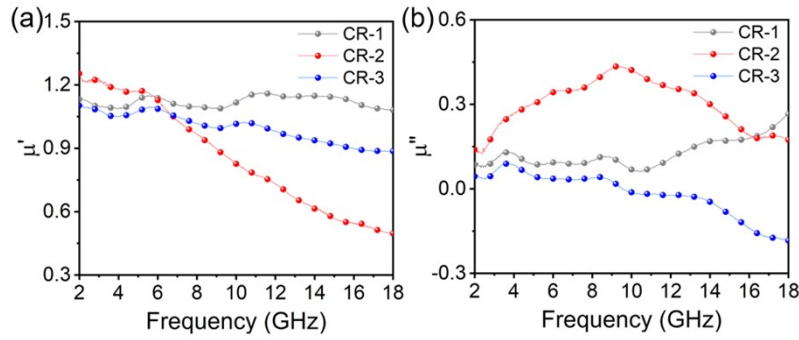

**Figure S4.** Real (a) and imaginary (b) permeability of CR-1, CR-2, and CR-3.

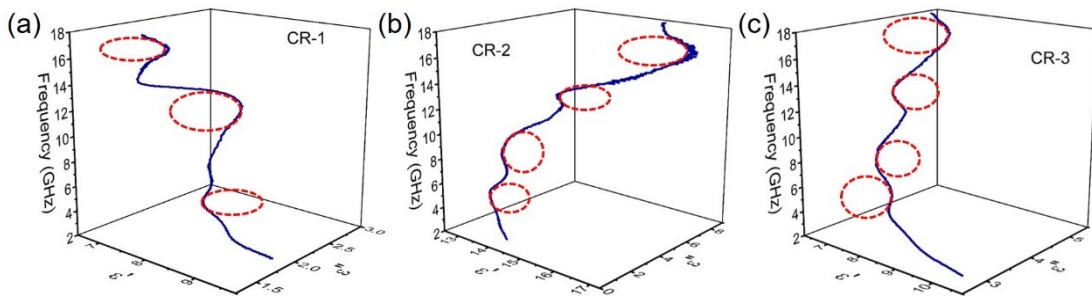

**Figure S5.** Cole-Cole curves of CR-1 (a), CR-2 (b), and CR-3 (c).

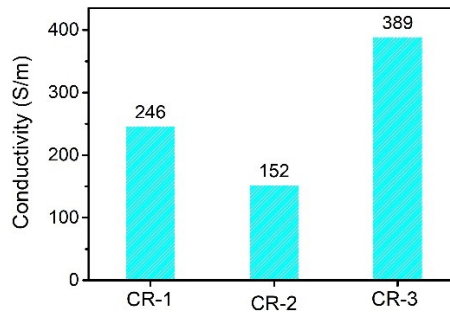

**Figure S6.** Electrical conductivity values of CR-1, CR-2, and CR-3.

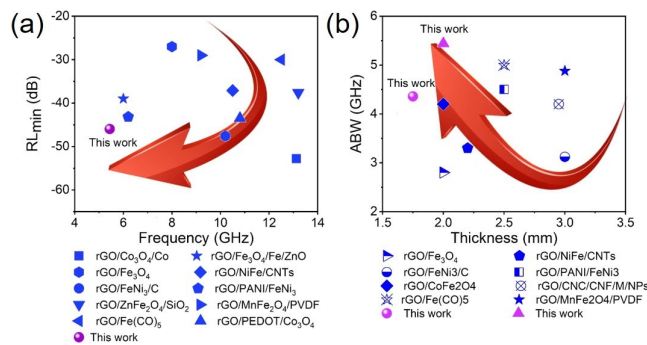

**Figure S7.** Comparison of maximum  $RL$  values and effective absorption bandwidth between as-prepared aerogels in this work and some reported rGO-based composite absorbers.

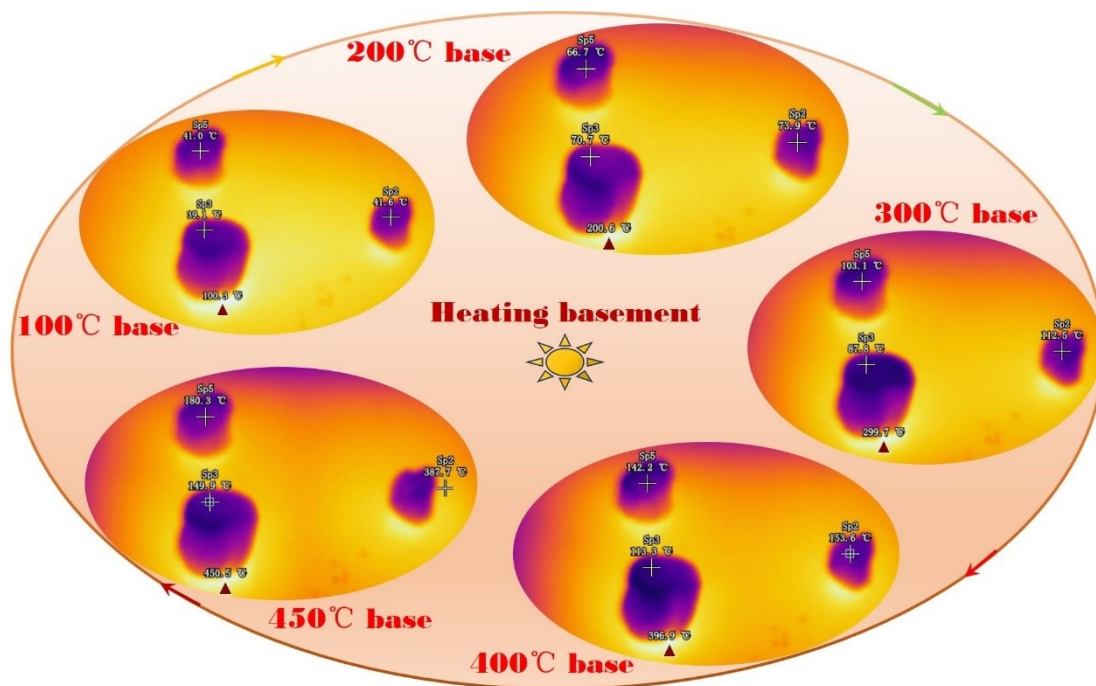

**Fig. S8** Thermal imaging of CR aerogels placing at heaters with rising heating temperatures (upper left: CR-3; left bottom: CR-1; right: CR-2).
